# Supplementary material
Source: PubMed Central journal article supplement (PMC5512439)
Supplement: NIHMS866485-supplement-1.pdf [file NIHMS866485-supplement-1.pdf]

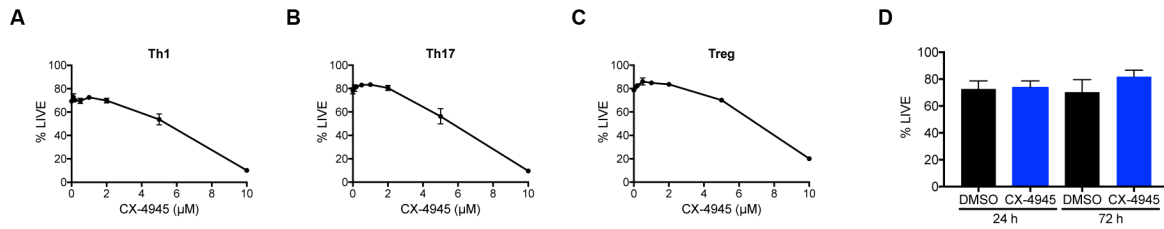

**Supplemental Figure 1. Dose-Dependent Effect of CX-4945 on Cell Viability.** (A-C) CD4<sup>+</sup> T cells were polarized to the Th1 (A), Th17 (B) or Treg (C) phenotype in the presence of increasing concentrations of CX-4945. At 72 h, viability was measured by viability dye exclusion. (D) CD4<sup>+</sup> T cells were activated with plate-bound anti-CD3 (10 μg/ml) and soluble anti-CD28 (1 μg/ml) in the absence of additional cytokines and in the absence or presence of CX-4945 (2 μM). Viability measured by viability dye exclusion at indicated times.

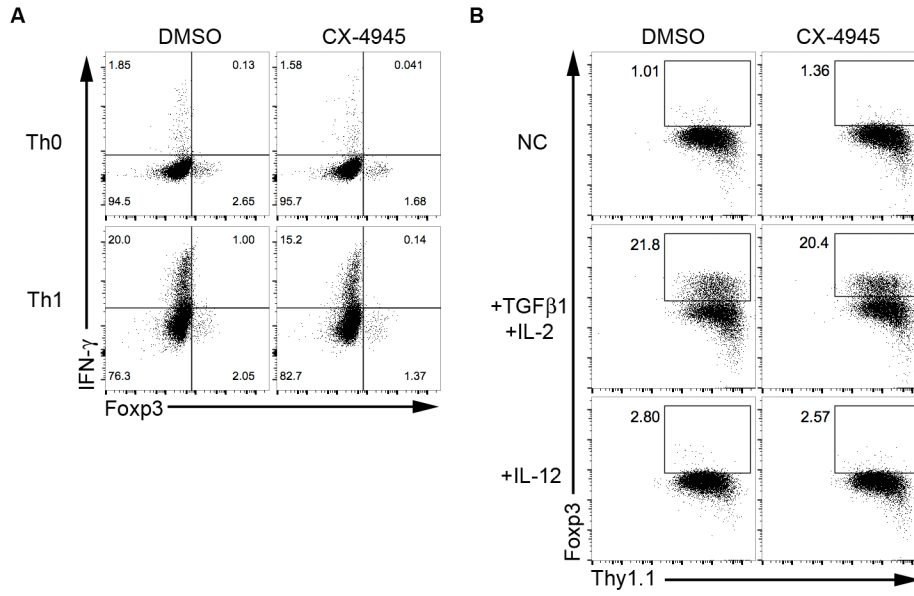

**Supplemental Figure 2. Effect of CX-4945 Treatment on Foxp3 Expression.** (A) CD4<sup>+</sup> T cells were activated in the absence of cytokines (Th0) or polarized to the Th1 phenotype in the absence or presence of CX-4945 (2 μM) for 72 h, and Foxp3 expression was detected by flow cytometry. (B) CD4<sup>+</sup> T cells from *Il17f<sup>Thy1.1</sup>.Foxp3<sup>GFP</sup>* mice were polarized to the Th17 phenotype for 72 h. Thy1.1<sup>+</sup> cells were then sorted and then restimulated with no cytokine (NC), IL-12 (10 ng/ml), or TGFβ1 (5 ng/ml and IL-2 (5 ng/ml) for 24 h in the absence or presence of CX-4945 (2 μM). Foxp3 expression was detected by flow cytometry.

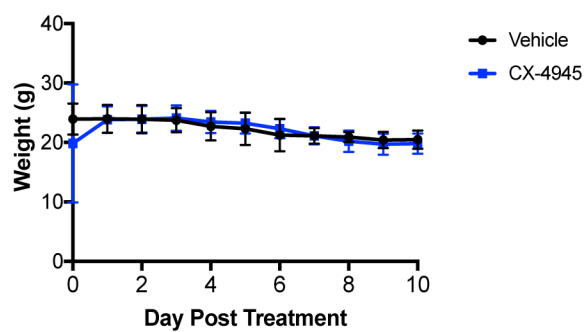

**Supplemental Figure 3. Effect of *In Vivo* CX-4945 Treatment on Mouse Weight.** C57BL/6 mice were treated with 20 mg/kg/day CX-4945 (n=5) or vehicle (n=4) from day 0 to 10, and weighed daily to detect potential toxicity.
